# Supplementary material
Source: publisher figshare collection journal article supplement (https://karger.figshare.com/ndownloader/files/7395793)
Supplement: Supplementary file 1 [file 7395793]

## Sheet: Sheet1
Table S11 . MetaA-MDD and GWAS-identified genes overlap: results from 20-200kb genomic windows
20 KB	p value	number of disease traits	total genes in catagory	metaA genes in catagory	genes
Neurological disorders & other brain phenotypes	0.0655	221	1453	53	LRP8,CREB5,MPP3,AAK1,NRXN3,ELOVL5,ARHGEF10,PHF20,UACA,KCNB2,SDCCAG1,EIF5B,ZMYM6,CGRRF1,NCAM1,TRAF3,SLC13A3,HIP1,NFIB,PRSS3,UNC13A,QDPR,HIVEP3,GAS2L1,SNX24,NUMB,PCDH7,PTPRD,WNK1,CAMK4,PTPN13,NCALD,MCTP1,GPR98,PRKRIP1,HPS5,ATF7,BDNF,OSBPL1A,KLHL24,KIAA0182,CACNB2,WWOX,CDH4,VAV2,EGFR,ADH5,EFEMP1,RRBP1,USP49,UBE2R2,FAM149A,SORBS1
Neuropsychiatric disorders	0.0211	97	720	31	LRP8,CREB5,MPP3,PHF20,UACA,EIF5B,ZMYM6,CGRRF1,NCAM1,TRAF3,HIP1,PRSS3,UNC13A,QDPR,HIVEP3,GAS2L1,NUMB,MCTP1,GPR98,PRKRIP1,HPS5,BDNF,KLHL24,KIAA0182,CACNB2,VAV2,ADH5,USP49,UBE2R2,FAM149A,SORBS1
MDD-related studies	0.1994	22	273	9	LRP8,MPP3,UNC13A,PRKRIP1,HPS5,KLHL24,CACNB2,VAV2,FAM149A
Aging	0.0304	30	215	14	LRRFIP1,NTRK3,AAK1,VEGFA,EIF4B,TRAF3,RIMBP2,CAMK4,RYR2,MPPED2,WWOX,GTPBP5,CDH4,AKT3
Medical illnesses related to MDD	0.2144	315	2608	89	SYNGR1,ACLY,CHP,DLG2,PCDH9,LRRFIP1,PRKAG2,GRB10,GALNT13,NTRK3,KTN1,ZNF365,NRXN3,MBP,IKZF4,VEGFA,UACA,KCNB2,ZNF207,DCN,BRE,YWHAB,ABLIM1,SBNO2,MARCH6,RPS26,EIF4B,PDE4B,TRAF3,SLC13A3,PRIM1,HIP1,SYN2,ARHGEF10L,FGD4,LAMA2,TUBG1,MBOAT2,BAT5,CPEB4,RIMBP2,GALNT10,DPF3,GOSR1,NUB1,MTHFD1L,PTPRD,KCNH6,WNK1,SDCCAG10,ANK3,CAMK4,FAM73A,ICA1,BCL11A,PTPN13,MCTP1,MESDC2,GPR98,RYR2,TOX,MPPED2,PSMD14,PAP2D,BDNF,EPB…
Cardiovascular diseases & related traits	0.5456	113	762	21	CHP,PRKAG2,UACA,KCNB2,DCN,RPS26,PDE4B,NUB1,MTHFD1L,WNK1,CAMK4,BCL11A,MESDC2,TOX,OSBPL1A,CACNB2,WWOX,OCA2,RGS7,USP49,POLR3A
Metabolic syndrome & related traits	0.2723	98	1281	43	SYNGR1,DLG2,PCDH9,GRB10,GALNT13,KTN1,NRXN3,BRE,YWHAB,ABLIM1,MARCH6,PDE4B,HIP1,SYN2,LAMA2,TUBG1,GALNT10,DPF3,PTPRD,SDCCAG10,ANK3,FAM73A,ICA1,BCL11A,PTPN13,GPR98,RYR2,TOX,PSMD14,PAP2D,BDNF,EPB41L1,CACNB2,WWOX,JPH1,VAV2,PDE8A,KCNMA1,MBTD1,GAD1,TBCD,AKT3,SORBS1
Immune system, Inflammation	0.601	94	847	33	ACLY,PCDH9,PRKAG2,ZNF365,MBP,IKZF4,UACA,KCNB2,ZNF207,SBNO2,SLC13A3,PRIM1,ARHGEF10L,FGD4,TUBG1,MBOAT2,BAT5,CPEB4,GOSR1,KCNH6,MCTP1,PSMD14,WWOX,OCA2,JPH1,RGS7,UAP1,EFEMP1,RRBP1,USP49,PCMTD2,SORBS1,EML4
Other medical illnesses not related to MDD	0.8252	444	2264	78	CALN1,DLG2,PCDH9,PRKAG2,GRB10,SGCD,CTDSP2,ZNF365,NRXN3,PHF20,IPP,ANKRD12,DCN,TGFBR2,WWP2,TPP2,ABLIM1,MARCH6,DIDO1,PDE4B,RASSF5,SLC13A3,HIP1,AMOTL1,PPP3CC,FBXO38,SCAMP5,SYNPO2,LAMA2,ATP2B4,TUBG1,STX4,ZNF558,EDIL3,HIVEP3,SFI1,GLS,KIAA1549,TDRD3,PTPRD,FHL2,ANK3,ITIH5,FIGNL1,BCL11A,PTPN13,NCALD,GPR98,TOX,MPPED2,ATF7,CSNK1A1,TTC3,OSBPL1A,NETO1,CACNB2,WWOX,TGFB2,CDH4,SCN1A,VAV2,EGFR,APOLD1,CLCN3,KCNMA1…
Cancer	0.96	110	549	15	PCDH9,TGFBR2,TPP2,ABLIM1,MARCH6,DIDO1,SFI1,FHL2,FIGNL1,CSNK1A1,WWOX,EGFR,ADH5,PCMTD2,GSK3B
Miscellaneous body measures	0.5671	230	1309	45	DLG2,PRKAG2,GRB10,GALNT13,SGCD,ZNF365,NRXN3,PHF20,IPP,ANKRD12,DCN,TGFBR2,WWP2,TMEM56,PDE4B,RASSF5,FBXO38,SCAMP5,SYNPO2,ATP2B4,EDIL3,HIVEP3,KIAA1549,TDRD3,ANK3,ITIH5,BCL11A,GPR98,MPPED2,ATF7,TTC3,NETO1,CACNB2,WWOX,TGFB2,SCN1A,KCNMA1,MBTD1,USP49,MAF,ITPK1,NGEF,POLR3A,CUGBP1,EML4
(Neurological) - (Neuropsychiatric disorders)	0.5507	118	792	24	AAK1,NRXN3,ELOVL5,ARHGEF10,KCNB2,SDCCAG1,SLC13A3,NFIB,SNX24,PCDH7,PTPRD,WNK1,CAMK4,PTPN13,NCALD,HPS5,ATF7,OSBPL1A,WWOX,CDH4,EGFR,EFEMP1,RRBP1,SORBS1
(Aging) - (Neuropsychiatric disorders)	0.0165	27	213	14	LRRFIP1,NTRK3,AAK1,VEGFA,EIF4B,TRAF3,RIMBP2,CAMK4,RYR2,MPPED2,WWOX,GTPBP5,CDH4,AKT3
50 KB
Neurological disorders & other brain phenotypes	0.0373	221	1823	60	LRP8,CAMK1G,CREB5,MPP3,AAK1,NRXN3,ELOVL5,ARHGEF10,PHF20,TRIM33,UACA,KCNB2,SDCCAG1,EIF5B,ZMYM6,PPM1D,CGRRF1,NCAM1,TRAF3,SLC13A3,HIP1,NFIB,PRSS3,UNC13A,HAX1,QDPR,HIVEP3,GAS2L1,SNX24,NUMB,MTHFD1L,PCDH7,PTPRD,WNK1,CAMK4,BCL11A,PTPN13,NCALD,MCTP1,GPR98,PRKRIP1,HPS5,ATF7,BDNF,OSBPL1A,KLHL24,KIAA0182,CACNB2,WWOX,CDH4,VAV2,EGFR,ADH5,EFEMP1,RRBP1,USP49,UBE2R2,FAM149A,GSK3B,SORBS1
Neuropsychiatric disorders	0.0083	97	913	35	LRP8,CREB5,MPP3,PHF20,TRIM33,UACA,SDCCAG1,EIF5B,ZMYM6,CGRRF1,NCAM1,TRAF3,HIP1,PRSS3,UNC13A,HAX1,QDPR,HIVEP3,GAS2L1,NUMB,BCL11A,MCTP1,GPR98,PRKRIP1,HPS5,BDNF,KLHL24,KIAA0182,CACNB2,VAV2,ADH5,USP49,UBE2R2,FAM149A,SORBS1
MDD-related studies	0.2191	22	338	10	LRP8,MPP3,TRIM33,UNC13A,PRKRIP1,HPS5,KLHL24,CACNB2,VAV2,FAM149A
Aging	0.0094	30	271	17	DLG2,CAMK1G,LRRFIP1,NTRK3,AAK1,VEGFA,EIF4B,TRAF3,RIMBP2,MTHFD1L,CAMK4,RYR2,MPPED2,WWOX,GTPBP5,CDH4,AKT3
Medical illnesses related to MDD	0.1572	315	3198	98	SYNGR1,ACLY,PCSK1,CHP,DLG2,PCDH9,CAMK1G,LRRFIP1,PRKAG2,GRB10,GALNT13,NTRK3,KTN1,ZNF365,NRXN3,MBP,IKZF4,VEGFA,UACA,KCNB2,ZNF207,AGL,DCN,BRE,YWHAB,ABLIM1,SBNO2,MARCH6,RPS26,EIF4B,PDE4B,TRAF3,SLC13A3,PRIM1,HIP1,SYN2,ARHGEF10L,FGD4,LAMA2,TUBG1,MBOAT2,BAT5,CPEB4,RIMBP2,GALNT10,DPF3,GOSR1,NUB1,MTHFD1L,PTPRD,KCNH6,WNK1,SDCCAG10,ANK3,CAMK4,FAM73A,ICA1,BCL11A,PTPN13,HERPUD2,MCTP1,MESDC2,GPR98,RYR2,TOX,MPP…
Cardiovascular diseases & related traits	0.5229	113	961	26	CHP,CAMK1G,PRKAG2,VEGFA,UACA,KCNB2,AGL,DCN,RPS26,PDE4B,NUB1,MTHFD1L,WNK1,CAMK4,BCL11A,MESDC2,TOX,OSBPL1A,CACNB2,WWOX,OCA2,TGFB2,RGS7,USP49,NPTX1,POLR3A
Metabolic syndrome & related traits	0.1464	98	1566	49	SYNGR1,PCSK1,DLG2,PCDH9,GRB10,GALNT13,KTN1,NRXN3,VEGFA,BRE,YWHAB,ABLIM1,MARCH6,PDE4B,HIP1,SYN2,ARHGEF10L,LAMA2,TUBG1,GALNT10,DPF3,PTPRD,SDCCAG10,ANK3,FAM73A,ICA1,BCL11A,PTPN13,HERPUD2,GPR98,RYR2,TOX,PSMD14,PAP2D,BDNF,EPB41L1,CACNB2,WWOX,JPH1,VAV2,PDE8A,KCNMA1,MBTD1,RGS4,GAD1,TBCD,AKT3,FAM149A,SORBS1
Immune system, Inflammation	0.7274	94	1028	34	ACLY,PCDH9,PRKAG2,ZNF365,MBP,IKZF4,UACA,KCNB2,ZNF207,SBNO2,SLC13A3,PRIM1,ARHGEF10L,FGD4,TUBG1,MBOAT2,BAT5,CPEB4,GOSR1,KCNH6,MCTP1,PSMD14,WWOX,OCA2,JPH1,GRLF1,RGS7,UAP1,EFEMP1,RRBP1,USP49,PCMTD2,SORBS1,EML4
Other medical illnesses not related to MDD	0.8704	444	2685	85	CALN1,DLG2,PCDH9,PRKAG2,COPS7A,GRB10,SGCD,CTDSP2,ZNF365,NRXN3,PHF20,VEGFA,IPP,ANKRD12,DCN,TGFBR2,WWP2,TPP2,PLA2G5,ABLIM1,MARCH6,DIDO1,PDE4B,RASSF5,SLC13A3,HIP1,AMOTL1,PPP3CC,FBXO38,SCAMP5,SYNPO2,LAMA2,ATP2B4,TUBG1,HAX1,STX4,ZNF558,EDIL3,HIVEP3,SFI1,GLS,KIAA1549,TDRD3,PTPRD,FHL2,ANK3,ITIH5,FIGNL1,BCL11A,PTPN13,NCALD,GPR98,TOX,MPPED2,ATF7,CCNY,CSNK1A1,TTC3,OSBPL1A,NETO1,CACNB2,WWOX,TGFB2,CDH4,SLC39…
Cancer	0.9755	110	660	16	PCDH9,TGFBR2,TPP2,ABLIM1,MARCH6,DIDO1,SFI1,FHL2,FIGNL1,CSNK1A1,WWOX,TGFB2,EGFR,ADH5,PCMTD2,GSK3B
Miscellaneous body measures	0.7214	230	1569	46	DLG2,PRKAG2,GRB10,GALNT13,SGCD,ZNF365,NRXN3,PHF20,VEGFA,IPP,ANKRD12,DCN,TGFBR2,WWP2,TMEM56,PDE4B,RASSF5,FBXO38,SCAMP5,SYNPO2,ATP2B4,EDIL3,HIVEP3,KIAA1549,TDRD3,ANK3,ITIH5,BCL11A,GPR98,MPPED2,ATF7,TTC3,NETO1,CACNB2,WWOX,TGFB2,SCN1A,KCNMA1,MBTD1,USP49,MAF,ITPK1,NGEF,POLR3A,CUGBP1,EML4
(Neurological) - (Neuropsychiatric disorders)	0.5935	118	995	28	CAMK1G,AAK1,NRXN3,ELOVL5,ARHGEF10,KCNB2,SDCCAG1,PPM1D,SLC13A3,NFIB,SNX24,MTHFD1L,PCDH7,PTPRD,WNK1,CAMK4,PTPN13,NCALD,HPS5,ATF7,OSBPL1A,WWOX,CDH4,EGFR,EFEMP1,RRBP1,GSK3B,SORBS1
(Aging) - (Neuropsychiatric disorders)	0.0095	27	269	17	DLG2,CAMK1G,LRRFIP1,NTRK3,AAK1,VEGFA,EIF4B,TRAF3,RIMBP2,MTHFD1L,CAMK4,RYR2,MPPED2,WWOX,GTPBP5,CDH4,AKT3
100 KB
Neurological disorders & other brain phenotypes	0.0212	221	2168	70	LRP8,CAMK1G,JPH3,CREB5,MPP3,AAK1,NRXN3,MBP,ELOVL5,ARHGEF10,PHF20,TRIM33,UACA,KCNB2,SDCCAG1,EIF5B,ZMYM6,PPM1D,CGRRF1,NCAM1,TRAF3,SLC13A3,HIP1,SYN2,NFIB,PRSS3,FGD4,ACSL3,UNC13A,HAX1,QDPR,HIVEP3,GAS2L1,SNX24,NUMB,MTHFD1L,PCDH7,PTPRD,WNK1,SDCCAG10,CAMK4,BCL11A,PTPN13,NCALD,MCTP1,GPR98,PRKRIP1,HPS5,ATF7,BDNF,OSBPL1A,KLHL24,KIAA0182,CACNB2,WWOX,TGFB2,CDH4,VAV2,FBXO32,EGFR,ZNF706,ADH5,EFEMP1,RRBP1,USP49…
Neuropsychiatric disorders	0.0069	97	1106	42	LRP8,JPH3,CREB5,MPP3,MBP,PHF20,TRIM33,UACA,SDCCAG1,EIF5B,ZMYM6,CGRRF1,NCAM1,TRAF3,HIP1,SYN2,PRSS3,ACSL3,UNC13A,HAX1,QDPR,HIVEP3,GAS2L1,NUMB,PTPRD,SDCCAG10,BCL11A,MCTP1,GPR98,PRKRIP1,HPS5,BDNF,KLHL24,KIAA0182,CACNB2,TGFB2,VAV2,ADH5,USP49,UBE2R2,FAM149A,SORBS1
MDD-related studies	0.3112	22	415	11	LRP8,JPH3,MPP3,TRIM33,UNC13A,PRKRIP1,HPS5,KLHL24,CACNB2,VAV2,FAM149A
Aging	0.0091	30	321	18	DLG2,CAMK1G,LRRFIP1,GALNT13,NTRK3,AAK1,VEGFA,EIF4B,TRAF3,RIMBP2,MTHFD1L,CAMK4,RYR2,MPPED2,WWOX,GTPBP5,CDH4,AKT3
Medical illnesses related to MDD	0.2965	315	3676	103	SYNGR1,ACLY,PIAS1,PCSK1,CHP,DLG2,PCDH9,CAMK1G,LRRFIP1,PRKAG2,GRB10,GALNT13,NTRK3,ARMC1,KTN1,ZNF365,NRXN3,MBP,IKZF4,VEGFA,UACA,KCNB2,ZNF207,AGL,DCN,BRE,YWHAB,ABLIM1,SBNO2,MARCH6,RPS26,EIF4B,PDE4B,TRAF3,SLC13A3,PRIM1,HIP1,SYN2,ARHGEF10L,FGD4,LAMA2,TUBG1,MBOAT2,BAT5,CPEB4,RIMBP2,GALNT10,DPF3,GOSR1,NUB1,MTHFD1L,PTPRD,KCNH6,WNK1,SDCCAG10,ANK3,CAMK4,FAM73A,ICA1,BCL11A,PTPN13,HERPUD2,MCTP1,MESDC2,GPR98,…
Cardiovascular diseases & related traits	0.6065	113	1125	30	PIAS1,CHP,CAMK1G,PRKAG2,VEGFA,UACA,KCNB2,AGL,DCN,RPS26,PDE4B,RIMBP2,NUB1,MTHFD1L,WNK1,SDCCAG10,CAMK4,BCL11A,MESDC2,TOX,OSBPL1A,CACNB2,WWOX,OCA2,TGFB2,RGS7,USP49,NPTX1,MAF,POLR3A
Metabolic syndrome & related traits	0.2793	98	1802	52	SYNGR1,PCSK1,DLG2,PCDH9,GRB10,GALNT13,KTN1,NRXN3,VEGFA,BRE,YWHAB,ABLIM1,MARCH6,PDE4B,HIP1,SYN2,ARHGEF10L,LAMA2,TUBG1,GALNT10,DPF3,PTPRD,SDCCAG10,ANK3,FAM73A,ICA1,BCL11A,PTPN13,HERPUD2,GPR98,RYR2,TOX,PSMD14,PAP2D,BDNF,EPB41L1,CACNB2,WWOX,OCA2,JPH1,VAV2,PDE8A,RGS7,KCNMA1,MBTD1,PSMD6,RGS4,GAD1,TBCD,AKT3,FAM149A,SORBS1
Immune system, Inflammation	0.7958	94	1207	38	ACLY,PCDH9,CAMK1G,PRKAG2,ARMC1,ZNF365,MBP,IKZF4,UACA,KCNB2,ZNF207,SBNO2,SLC13A3,PRIM1,ARHGEF10L,FGD4,TUBG1,MBOAT2,BAT5,CPEB4,RIMBP2,GOSR1,KCNH6,MCTP1,PSMD14,WWOX,OCA2,JPH1,GRLF1,DAB2IP,RGS7,UAP1,EFEMP1,RRBP1,USP49,PCMTD2,SORBS1,EML4
Other medical illnesses not related to MDD	0.7411	444	3076	97	LRP8,NPTX2,CALN1,PIAS1,DLG2,PCDH9,PRKAG2,COPS7A,GRB10,SGCD,CTDSP2,ZNF365,NRXN3,PHF20,VEGFA,IPP,TRIM33,KCNB2,ANKRD12,DCN,TGFBR2,WWP2,TPP2,PLA2G5,ABLIM1,MARCH6,DIDO1,PPP2R3A,PDE4B,ATP2B2,RASSF5,SLC13A3,HIP1,AMOTL1,PPP3CC,FBXO38,SCAMP5,SYNPO2,LAMA2,ATP2B4,TUBG1,SLC1A1,HAX1,STX4,ZNF558,EDIL3,HIVEP3,SFI1,GLS,KIAA1549,TDRD3,PTPRD,FHL2,ANK3,ITIH5,FIGNL1,BCL11A,PTPN13,HERPUD2,NCALD,GPR98,IVNS1ABP,TOX,MPP…
Cancer	0.8825	110	771	23	NPTX2,PCDH9,ZNF365,TRIM33,TGFBR2,TPP2,ABLIM1,MARCH6,DIDO1,SLC1A1,SFI1,FHL2,SDCCAG10,FIGNL1,CSNK1A1,KCNF1,WWOX,TGFB2,FBXO32,EGFR,ADH5,PCMTD2,GSK3B
Miscellaneous body measures	0.7198	230	1812	52	NPTX2,PIAS1,DLG2,PRKAG2,GRB10,GALNT13,SGCD,ZNF365,NRXN3,PHF20,VEGFA,IPP,KCNB2,ANKRD12,DCN,TGFBR2,WWP2,TMEM56,PPP2R3A,PDE4B,ATP2B2,RASSF5,FBXO38,SCAMP5,SYNPO2,ATP2B4,EDIL3,HIVEP3,KIAA1549,TDRD3,ANK3,ITIH5,BCL11A,GPR98,MPPED2,ATF7,EXOC6,TTC3,NETO1,CACNB2,WWOX,TGFB2,SCN1A,KCNMA1,MBTD1,USP49,MAF,ITPK1,NGEF,POLR3A,CUGBP1,EML4
(Neurological) - (Neuropsychiatric disorders)	0.5014	118	1185	33	CAMK1G,AAK1,NRXN3,ELOVL5,ARHGEF10,KCNB2,SDCCAG1,PPM1D,SLC13A3,NFIB,FGD4,SNX24,MTHFD1L,PCDH7,PTPRD,WNK1,CAMK4,BCL11A,PTPN13,NCALD,HPS5,ATF7,OSBPL1A,WWOX,CDH4,FBXO32,EGFR,ZNF706,EFEMP1,RRBP1,SNCA,GSK3B,SORBS1
(Aging) - (Neuropsychiatric disorders)	0.0112	27	319	18	DLG2,CAMK1G,LRRFIP1,GALNT13,NTRK3,AAK1,VEGFA,EIF4B,TRAF3,RIMBP2,MTHFD1L,CAMK4,RYR2,MPPED2,WWOX,GTPBP5,CDH4,AKT3
200 KB
Neurological disorders & other brain phenotypes	0.0285	221	2483	75	LRP8,DLG2,CAMK1G,JPH3,CREB5,MPP3,NEUROD6,SGCD,AAK1,NRXN3,ELOVL5,ARHGEF10,PHF20,TRIM33,UACA,KCNB2,SDCCAG1,TGFBR2,EIF5B,ZMYM6,PPM1D,CGRRF1,NCAM1,TRAF3,SLC13A3,HIP1,SYN2,NFIB,PRSS3,FGD4,ACSL3,UNC13A,HAX1,QDPR,HIVEP3,GAS2L1,SNX24,NUMB,MTHFD1L,PCDH7,PTPRD,RIMS1,WNK1,SDCCAG10,CAMK4,BCL11A,PTPN13,NCALD,MCTP1,GPR98,PRKRIP1,HPS5,ATF7,EXOC6,BDNF,OSBPL1A,KLHL24,KIAA0182,CACNB2,WWOX,TGFB2,CDH4,NMU,VAV2,FBXO3…
Neuropsychiatric disorders	0.0126	97	1267	42	LRP8,JPH3,CREB5,MPP3,NEUROD6,PHF20,TRIM33,UACA,SDCCAG1,EIF5B,ZMYM6,CGRRF1,NCAM1,TRAF3,HIP1,SYN2,PRSS3,ACSL3,UNC13A,HAX1,QDPR,HIVEP3,GAS2L1,NUMB,PTPRD,SDCCAG10,BCL11A,MCTP1,GPR98,PRKRIP1,HPS5,BDNF,KLHL24,KIAA0182,CACNB2,TGFB2,VAV2,ADH5,USP49,UBE2R2,FAM149A,SORBS1
MDD-related studies	0.2513	22	489	13	LRP8,JPH3,MPP3,NEUROD6,TRIM33,UACA,UNC13A,PRKRIP1,HPS5,KLHL24,CACNB2,VAV2,FAM149A
Aging	0.009	30	360	19	DLG2,CAMK1G,LRRFIP1,GALNT13,NTRK3,SGCD,AAK1,VEGFA,EIF4B,TRAF3,RIMBP2,MTHFD1L,CAMK4,RYR2,MPPED2,WWOX,GTPBP5,CDH4,AKT3
Medical illnesses related to MDD	0.2832	315	4060	115	SYNGR1,NPTX2,ACLY,PIAS1,PCSK1,LBH,CHP,DLG2,PCDH9,CAMK1G,LRRFIP1,PRKAG2,PLXNA2,GRB10,GALNT13,NTRK3,ARMC1,KTN1,ZNF365,NRXN3,MBP,IKZF4,VEGFA,UACA,KCNB2,ZNF207,AGL,DCN,BRE,YWHAB,ABLIM1,RYK,SBNO2,MARCH6,RPS26,EIF4B,PDE4B,TRAF3,SLC13A3,PRIM1,HIP1,SYN2,ARHGEF10L,FGD4,LAMA2,TUBG1,SLC1A1,MBOAT2,BAT5,CPEB4,RIMBP2,EDIL3,GALNT10,DPF3,GOSR1,NUB1,MTHFD1L,PTPRD,KCNH6,WNK1,SDCCAG10,ANK3,CAMK4,FAM73A,ICA1,BCL11A,…
Cardiovascular diseases & related traits	0.6871	113	1264	33	PIAS1,CHP,CAMK1G,PRKAG2,VEGFA,UACA,KCNB2,AGL,DCN,RPS26,PDE4B,RIMBP2,NUB1,MTHFD1L,PTPRD,WNK1,SDCCAG10,CAMK4,BCL11A,MESDC2,TOX,OSBPL1A,CACNB2,WWOX,OCA2,TGFB2,RGS7,AXIN2,USP49,NPTX1,STOX2,MAF,POLR3A
Metabolic syndrome & related traits	0.1311	98	2034	61	SYNGR1,NPTX2,PCSK1,DLG2,PCDH9,PLXNA2,GRB10,GALNT13,KTN1,NRXN3,VEGFA,BRE,YWHAB,ABLIM1,RYK,MARCH6,PDE4B,HIP1,SYN2,ARHGEF10L,LAMA2,TUBG1,SLC1A1,GALNT10,DPF3,PTPRD,SDCCAG10,ANK3,FAM73A,ICA1,BCL11A,PTPN13,TCF4,HERPUD2,GPR98,RYR2,TOX,EXOC6,PSMD14,PAP2D,BDNF,EPB41L1,CACNB2,WWOX,OCA2,JPH1,VAV2,ZNF664,PDE8A,RGS7,KCNMA1,EFEMP1,MBTD1,PSMD6,RGS4,GAD1,TBCD,AKT3,KCNK9,FAM149A,SORBS1
Immune system, Inflammation	0.8365	94	1336	40	ACLY,LBH,PCDH9,CAMK1G,PRKAG2,ARMC1,ZNF365,MBP,IKZF4,UACA,KCNB2,ZNF207,SBNO2,SLC13A3,PRIM1,ARHGEF10L,FGD4,TUBG1,MBOAT2,BAT5,CPEB4,RIMBP2,EDIL3,GOSR1,KCNH6,MCTP1,PSMD14,WWOX,OCA2,JPH1,GRLF1,DAB2IP,RGS7,UAP1,EFEMP1,RRBP1,USP49,PCMTD2,SORBS1,EML4
Other medical illnesses not related to MDD	0.7497	444	3419	98	LRP8,NPTX2,CALN1,PIAS1,DLG2,PCDH9,PRKAG2,COPS7A,GRB10,SGCD,CTDSP2,ZNF365,NRXN3,PHF20,VEGFA,IPP,TRIM33,KCNB2,ANKRD12,DCN,TGFBR2,WWP2,TPP2,PLA2G5,ABLIM1,MARCH6,DIDO1,PPP2R3A,PDE4B,RASSF5,SLC13A3,HIP1,AMOTL1,PPP3CC,FBXO38,FGD4,SCAMP5,SYNPO2,LAMA2,ATP2B4,TUBG1,SLC1A1,HAX1,STX4,ZNF558,GAD2,EDIL3,HIVEP3,SFI1,GLS,KIAA1549,TDRD3,PTPRD,FHL2,ANK3,ITIH5,FIGNL1,BCL11A,PTPN13,HERPUD2,NCALD,GPR98,IVNS1ABP,TOX,…
Cancer	0.8307	110	879	26	NPTX2,PCDH9,ZNF365,TRIM33,TGFBR2,TPP2,ABLIM1,MARCH6,DIDO1,PDE4B,FGD4,SLC1A1,SFI1,FHL2,SDCCAG10,FIGNL1,CSNK1A1,KCNF1,WWOX,TGFB2,FBXO32,EGFR,KCNMA1,ADH5,PCMTD2,GSK3B
Miscellaneous body measures	0.7856	230	2027	51	NPTX2,PIAS1,DLG2,PRKAG2,GRB10,GALNT13,SGCD,ZNF365,NRXN3,PHF20,VEGFA,IPP,KCNB2,ANKRD12,DCN,TGFBR2,WWP2,TMEM56,PPP2R3A,PDE4B,RASSF5,FBXO38,SCAMP5,SYNPO2,ATP2B4,EDIL3,HIVEP3,KIAA1549,TDRD3,ANK3,ITIH5,BCL11A,GPR98,MPPED2,ATF7,EXOC6,TTC3,NETO1,CACNB2,WWOX,TGFB2,SCN1A,KCNMA1,MBTD1,USP49,MAF,ITPK1,NGEF,POLR3A,CUGBP1,EML4
(Neurological) - (Neuropsychiatric disorders)	0.4748	118	1373	38	DLG2,CAMK1G,SGCD,AAK1,NRXN3,ELOVL5,ARHGEF10,KCNB2,SDCCAG1,TGFBR2,PPM1D,SLC13A3,NFIB,FGD4,SNX24,MTHFD1L,PCDH7,PTPRD,RIMS1,WNK1,CAMK4,BCL11A,PTPN13,NCALD,HPS5,ATF7,EXOC6,OSBPL1A,WWOX,CDH4,NMU,FBXO32,EGFR,ZNF706,EFEMP1,RRBP1,SNCA,SORBS1
(Aging) - (Neuropsychiatric disorders)	0.009	27	358	19	DLG2,CAMK1G,LRRFIP1,GALNT13,NTRK3,SGCD,AAK1,VEGFA,EIF4B,TRAF3,RIMBP2,MTHFD1L,CAMK4,RYR2,MPPED2,WWOX,GTPBP5,CDH4,AKT3
